# Supplementary material for: Facile design of mesoporous spherical cerium oxide@reduced graphene oxide nanocomposites with excellent microwave absorption
Source: Royal Society of Chemistry journal article supplement (doi:10.1039/d4tc01637h), 2024-01-01
Supplement: d4tc01637h1.pdf [file d4tc01637h1.pdf]

## **Facile design of mesoporous spherical cerium oxide@reduced graphene oxide nanocomposites with excellent microwave absorption**

Zhihao Liu,<sup>a§</sup> Jing Wang,<sup>a§</sup> Qianqian Ren,<sup>a</sup> Weihang Ma,<sup>a</sup> Wei Li,<sup>a</sup> Bonan Liu,<sup>a</sup> Qian Han,<sup>a</sup> RunYu Zan,<sup>a</sup> Hongyang Zhu,<sup>b,c</sup> Han Zhang,<sup>a</sup> Zhiyong Zhang,<sup>a</sup> Wu Zhao,<sup>a</sup> Yingnan Wang,<sup>a,\*</sup>

<sup>a</sup> School of Information Science and Technology, Northwest University, Xi'an, 710127, China

b. School of Physics and Electronic Engineering, Linyi University, Linyi, 276005, China.

c. Department of Physics and Engineering Physics, University of Tulsa, Tulsa, Oklahoma 74104, United States.

E-mail: [ynwang@nwu.edu.cn](mailto:ynwang@nwu.edu.cn)

Keywords: microwave absorbing material, reduced graphene oxide, three-dimensional framework structure, CeO<sub>2</sub>, multi-walled carbon nanotubes

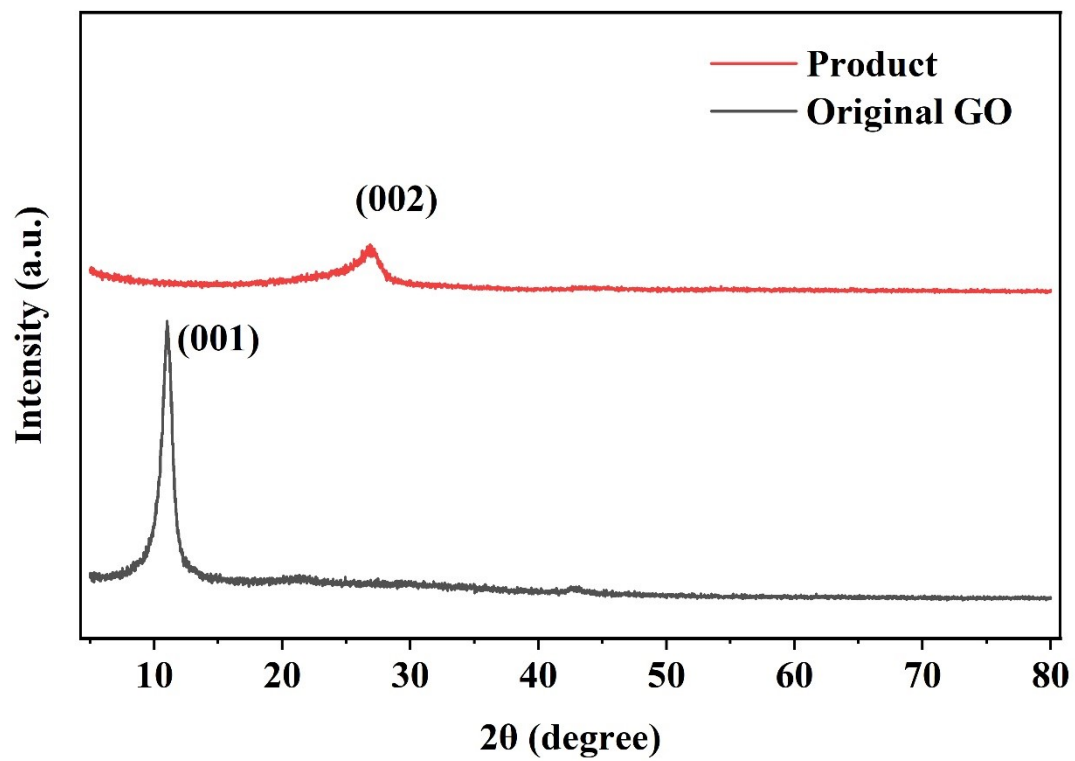

Figure S1. Comparison of the XRD patterns of RGO and original GO

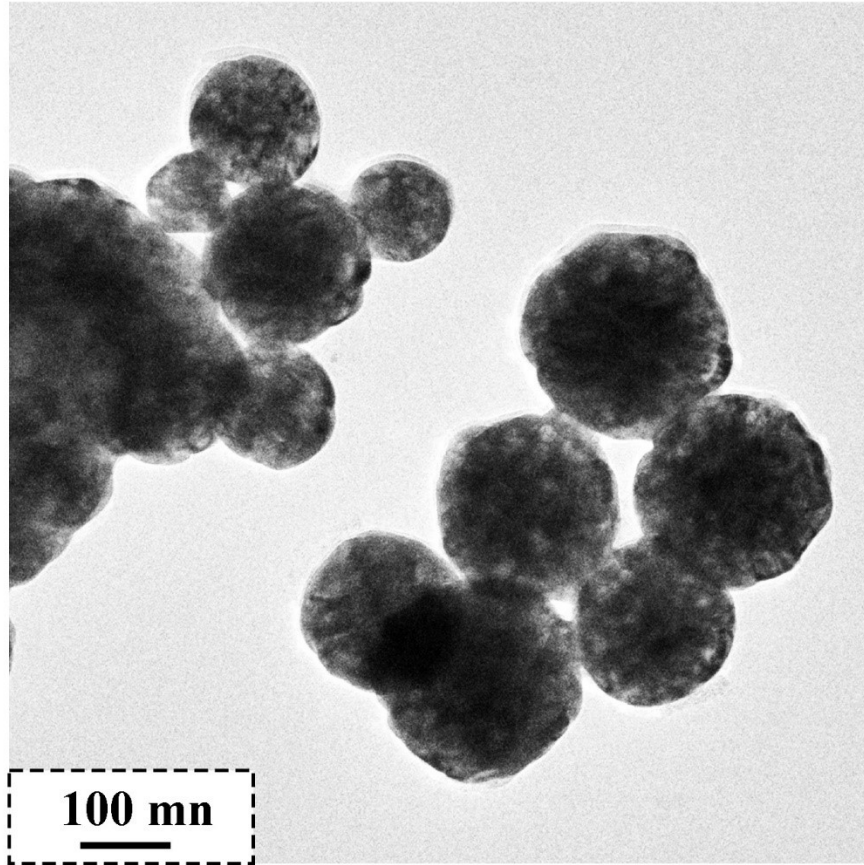

Figure S2. TEM image of mesoporous spherical CeO<sub>2</sub>

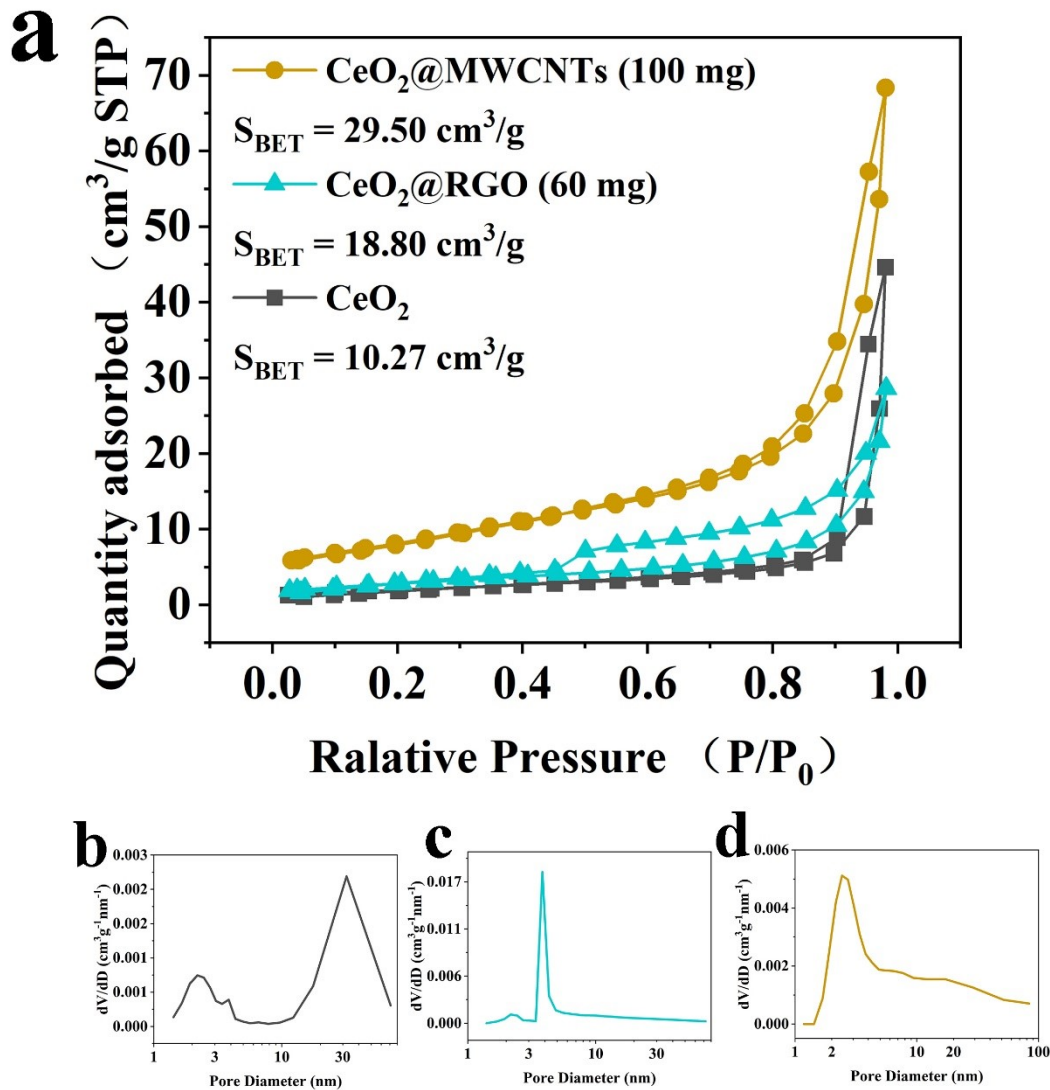

Figure S3. (a) Nitrogen adsorption-desorption isotherm of pure  $\text{CeO}_2$ ,  $\text{CeO}_2\text{@RGO}$  (60 mg) and  $\text{CeO}_2\text{@MWCNTs}$  (100 mg), and pore size distributions of (b) pure  $\text{CeO}_2$ , (c)  $\text{CeO}_2\text{@RGO}$  (60 mg) and (d)  $\text{CeO}_2\text{@MWCNTs}$  (100 mg).

Table S1. Microwave absorption properties of CeO<sub>2</sub>@RGO under different experimental parameters.

| GO    | Ratio (wt%) | RL <sub>min</sub> (dB) | EAB (GHz) | Thickness (mm) |
|-------|-------------|------------------------|-----------|----------------|
| 40 mg | 20          | -22.69                 | 1.75      | 2.77           |
| /     | 30          | -56.49                 | 5.34      | 1.60           |
| /     | 40          | -36.29                 | 4.08      | 1.49           |
| 60 mg | 20          | -61.92                 | 5.88      | 1.77           |
| /     | 30          | -55.03                 | 6.46      | 1.39           |
| /     | 40          | -16.49                 | 4.13      | 1.34           |
| 80 mg | 20          | -9.01                  | -         | -              |
| /     | 30          | -51.94                 | 4.80      | 2.83           |
| /     | 40          | -12.64                 | 3.28      | 1.34           |

Table S2. Microwave absorption properties of CeO<sub>2</sub>@MWCNTs under different experimental parameters.

| MWCNTs | Ratio (wt%) | RL <sub>min</sub> (dB) | EAB (GHz) | Thickness (mm) |
|--------|-------------|------------------------|-----------|----------------|
| 40 mg  | 20          | -17.29                 | 1.66      | 4.99           |
| /      | 30          | -60.04                 | 3.55      | 2.72           |
| /      | 40          | -54.26                 | 4.62      | 1.49           |
| /      | 50          | -18.77                 | 3.99      | 1.27           |
| 60 mg  | 30          | -71.80                 | 4.62      | 1.64           |
| /      | 40          | -19.18                 | 4.94      | 1.47           |
| /      | 50          | -12.16                 | 2.42      | 1.08           |
| 80 mg  | 20          | -57.57                 | 4.33      | 1.72           |
| /      | 30          | -46.12                 | 5.75      | 1.62           |
| /      | 40          | -8.60                  | -         | -              |
| 100 mg | 20          | -54.60                 | 4.04      | 4.28           |
| /      | 30          | -35.00                 | 6.51      | 1.77           |
| /      | 40          | -11.12                 | 0.49      | 2.65           |
| 120 mg | 20          | -61.55                 | 4.22      | 2.58           |
| /      | 30          | -32.43                 | 4.80      | 2.33           |

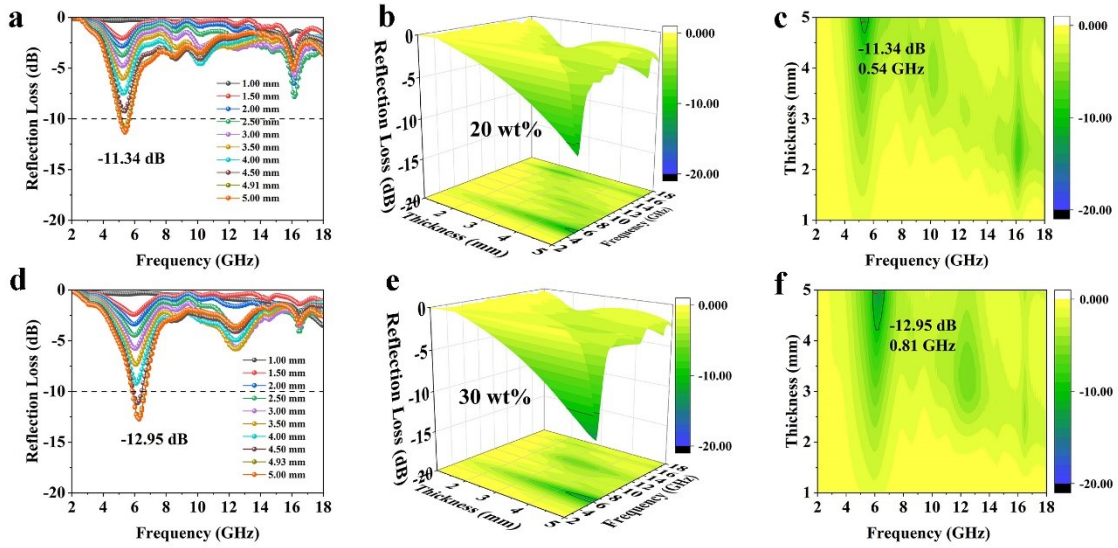

Figure S4. The RL curves, 3D and 2D color map of  $\text{CeO}_2$  (a-c) 20 wt%, (d-f) 30 wt%.

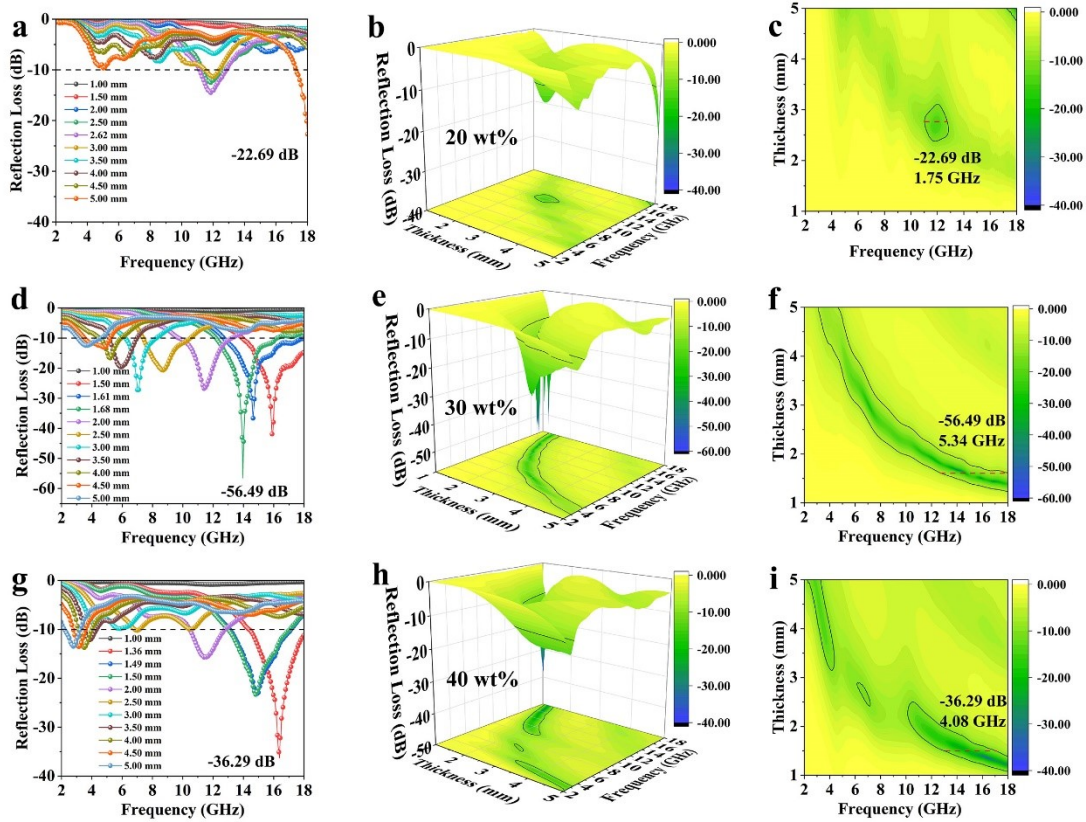

Figure S5. The RL curves, 3D and 2D color map of  $\text{CeO}_2@RGO$  (40 mg) with different filling ratios, (a-c) 20%, (d-f) 30%, and (g-i) 40%.

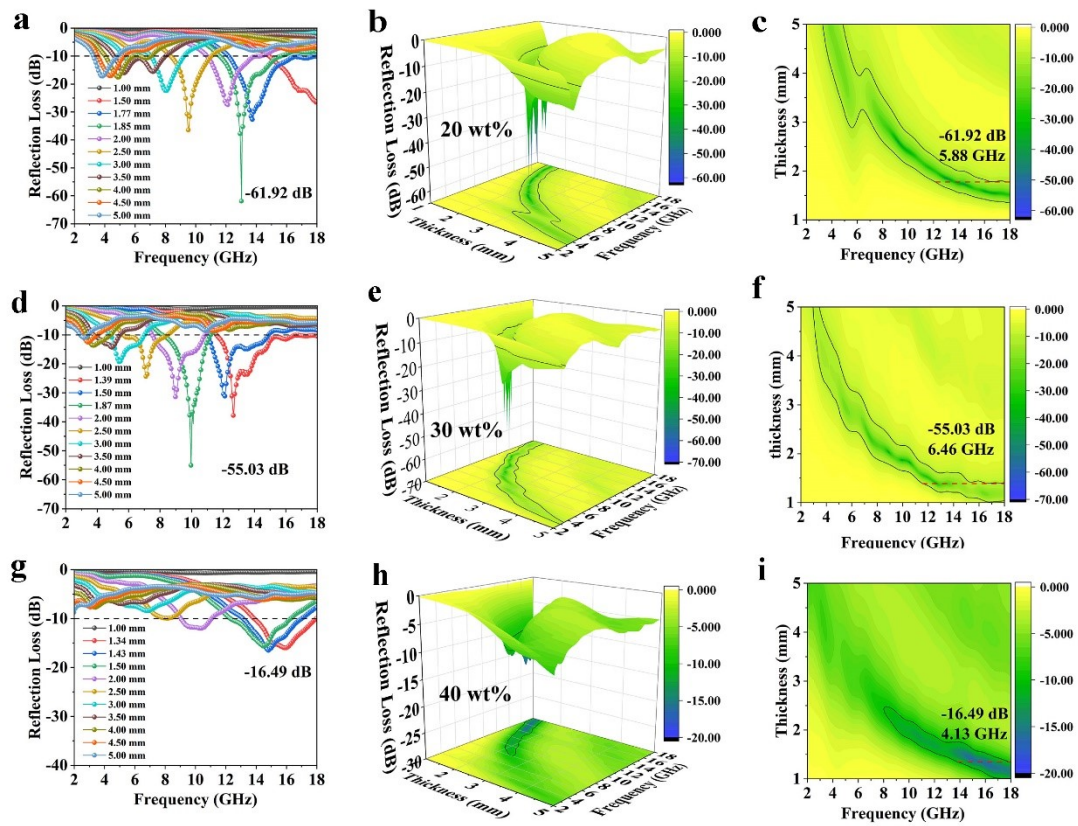

Figure S6. The RL curves, 3D and 2D color map of CeO<sub>2</sub>@RGO (60 mg) with different filling ratios, (a-c) 20%, (d-f) 30%, and (g-i) 40%.



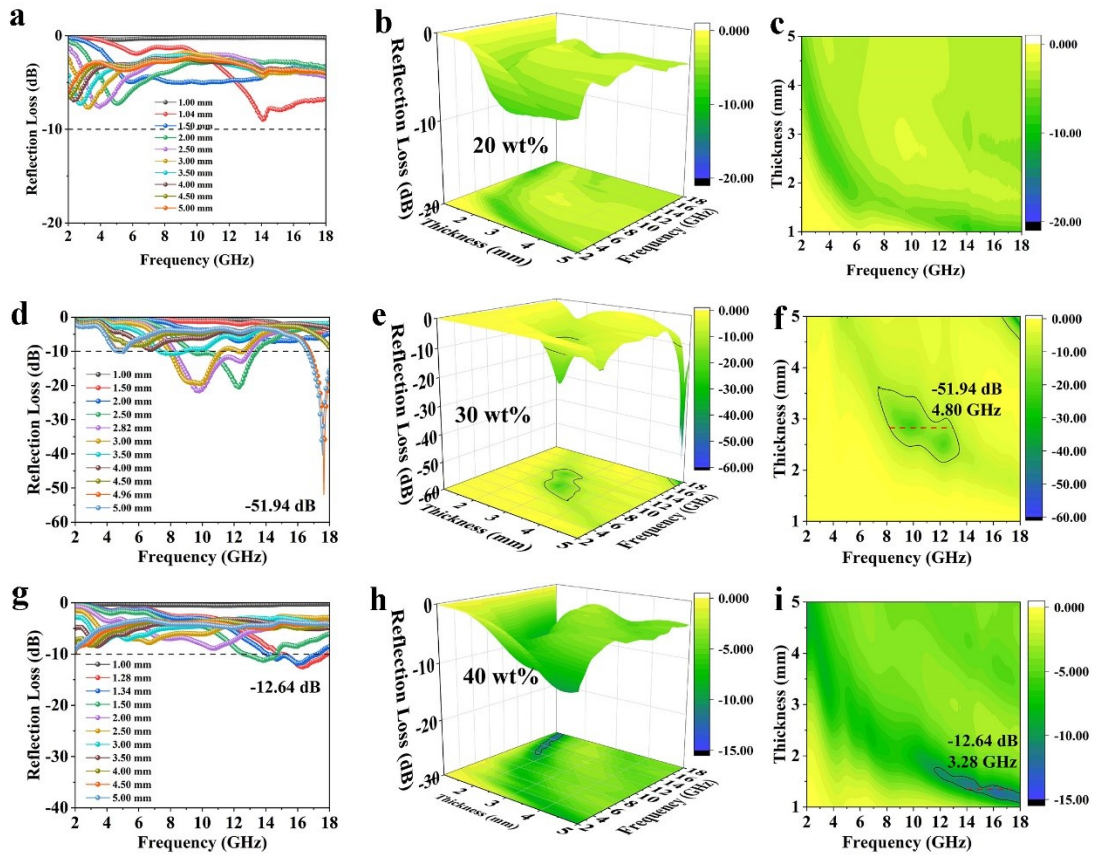

Figure S7. The RL curves, 3D and 2D color map of CeO<sub>2</sub>@RGO (80 mg) with different filling ratios, (a-c) 20%, (d-f) 30%, and (g-i) 40%.

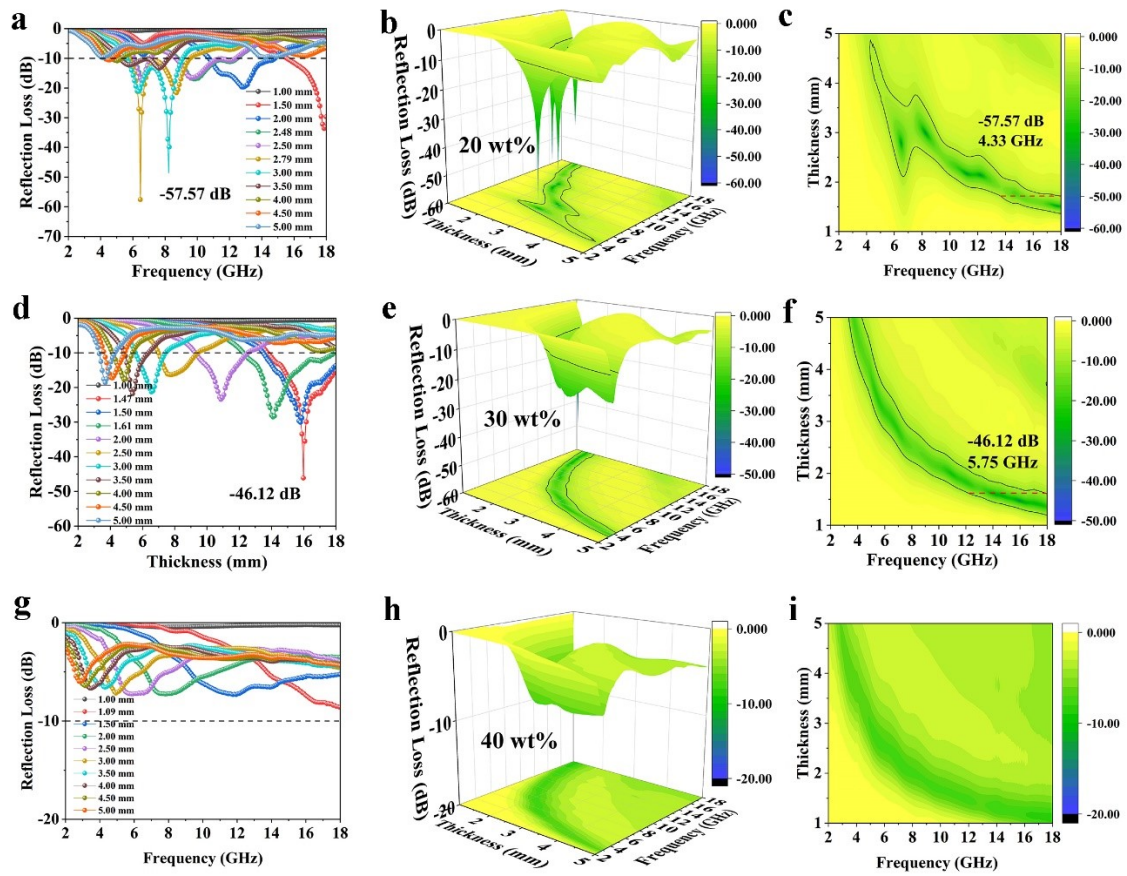

Figure S8. The RL curves, 3D and 2D color map of  $\text{CeO}_2@\text{MWCNTs}$  (80 mg) with different filling ratios, (a-c) 20%, (d-f) 30%, and (g-i) 40%.

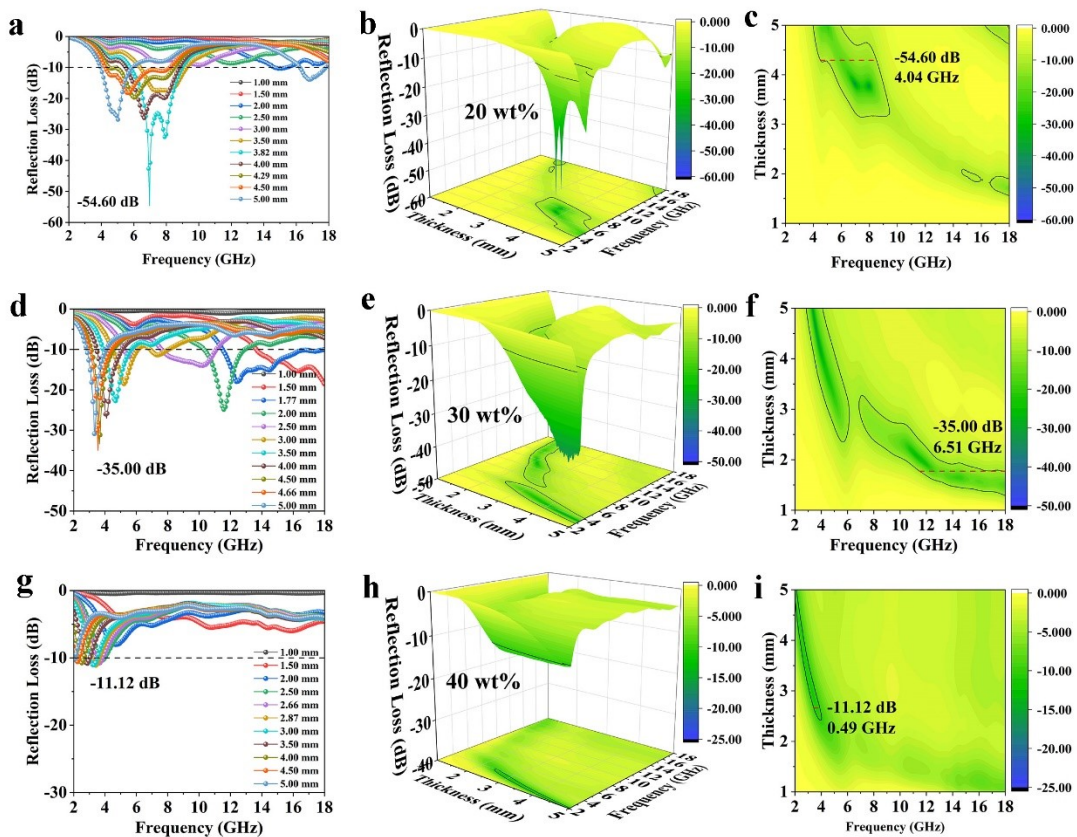

Figure S9. The RL curves, 3D and 2D color map of CeO<sub>2</sub>@MWCNTs (100 mg) with different filling ratios, (a-c) 20%, (d-f) 30%, and (g-i) 40%.

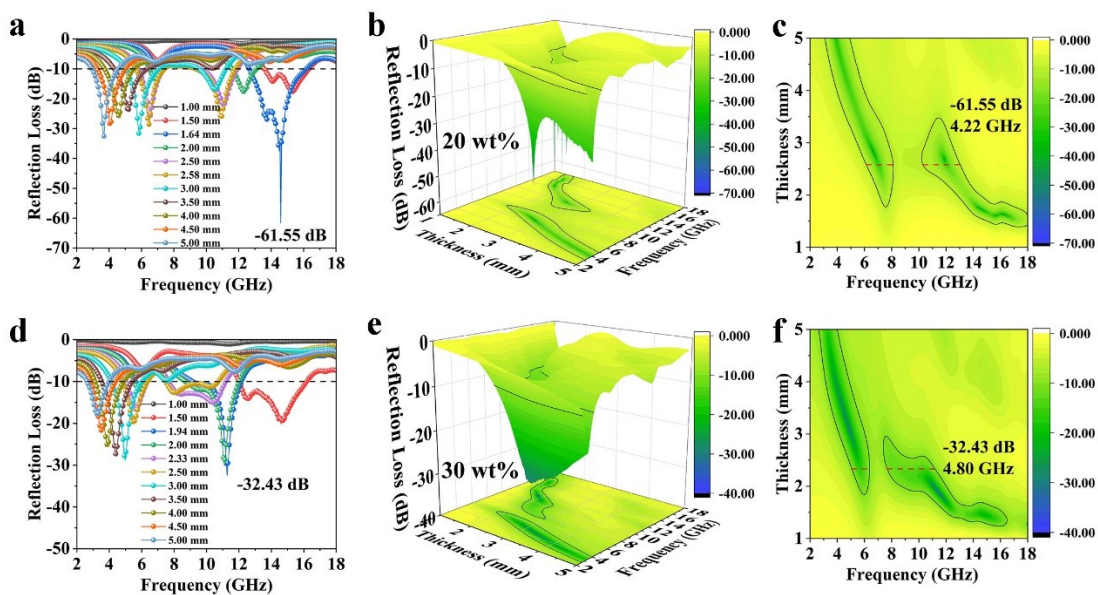

Figure S10. The RL curves, 3D and 2D color map of CeO<sub>2</sub>@MWCNTs (120 mg) with



different filling ratios, (a-c) 20% and (d-f) 30%

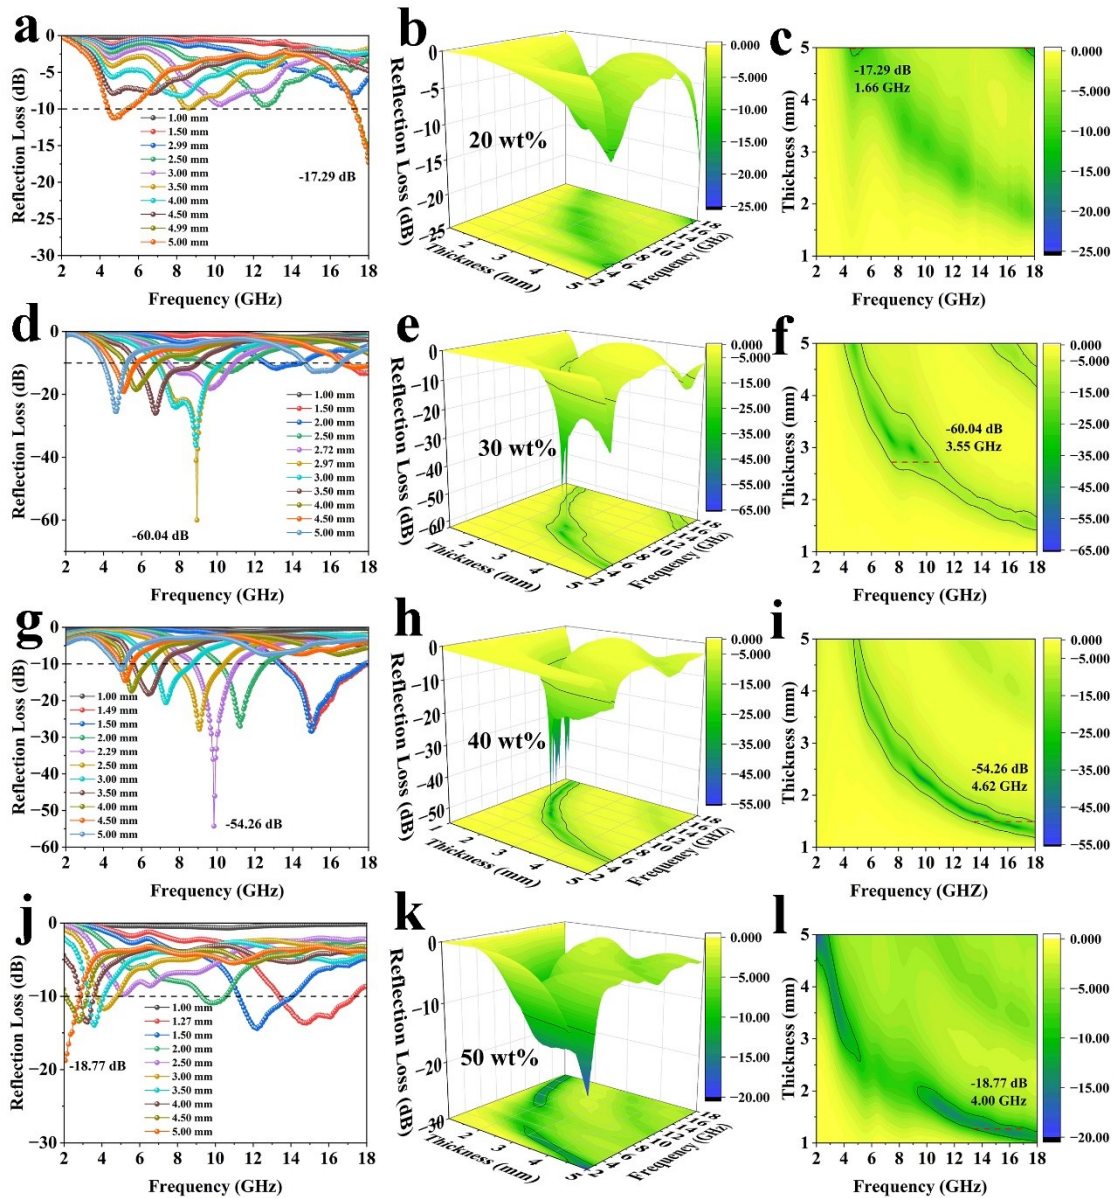

Figure S11. The RL curves, 3D and 2D color map of CeO<sub>2</sub>@MWCNTs (40 mg) (a-c) 20 wt%, (d-f) 30 wt%, (g-i) 40 wt%, (j-l) 50 wt%

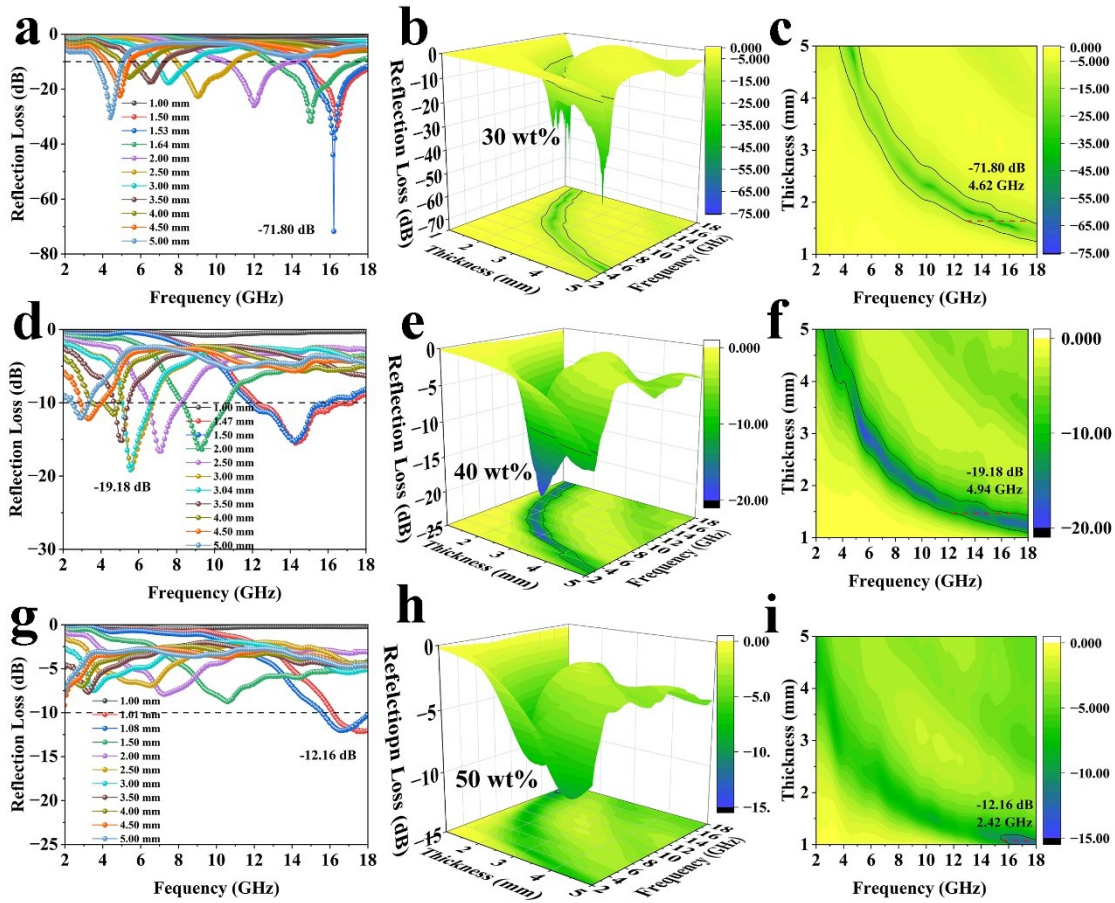

Figure S12. The RL curves, 3D and 2D color map of CeO<sub>2</sub>@MWCNTs (60 mg) (a-c) 30 wt%, (d-f) 40 wt%, (g-i) 50 wt%
